# Supplementary material for: Screening of α-amylase/trypsin inhibitor activity in wheat, spelt and einkorn by high-performance thin-layer chromatography
Source: Royal Society of Chemistry journal article supplement (doi:10.1039/d4ay00402g), 2024-01-01
Supplement: d4ay00402g1.pdf [file d4ay00402g1.pdf]

## Supplementary Information

### **Screening of $\alpha$ -amylase/trypsin inhibitor activity in wheat, spelt and einkorn by high-performance thin-layer chromatography**

Isabel Müller, Bianca Schmid, Loredana Bosa, Gertrud Elisabeth Morlock\*

Chair of Food Science, Institute of Nutritional Science, and Interdisciplinary Research Centre for Biosystems, Land Use and Nutrition, Justus Liebig University Giessen, Heinrich-Buff-Ring 26-32, 35392 Giessen, Germany

\*Corresponding author: Prof. Dr. Gertrud Morlock, phone: +49-641-9939141; fax +49-641-99-39149, email: [gertrud.morlock@uni-giessen.de](mailto:gertrud.morlock@uni-giessen.de)

## Table of contents

|                 |                                                                                                                                                                                                                                                                                                                                                                                                                                                                                                                                                                                                                                                                                                    |    |
|-----------------|----------------------------------------------------------------------------------------------------------------------------------------------------------------------------------------------------------------------------------------------------------------------------------------------------------------------------------------------------------------------------------------------------------------------------------------------------------------------------------------------------------------------------------------------------------------------------------------------------------------------------------------------------------------------------------------------------|----|
| <b>Table S1</b> | Absorbance values of the three saccharides released after the amylolysis for the different flour extracts, the positive controls (PC1/PC2, acarbose) and the negative control (NC, bi-distilled water) as well as the corrected absorbance (flour extract impurities subtracted), relative inhibition regarding each saccharide and the overall inhibition referred to the NC.                                                                                                                                                                                                                                                                                                                     | S4 |
| <b>Fig. S1</b>  | HPTLC-Vis chromatograms for mobile phase optimization with different ratios of 2-butanol/ammonia (25%)/pyridine/water <b>1)</b> 10:5:17:13, <b>2)</b> 19:5:8:13, <b>3)</b> 19:5:17:6, <b>4)</b> 19:5:17:13(V/V/V/V); HPTLC silica gel 60 plate derivatized with the ninhydrin reagent and detected at white light illumination (remission and transmission mode).                                                                                                                                                                                                                                                                                                                                  | S5 |
| <b>Fig. S2</b>  | HPTLC-Vis chromatograms showing separated refined wheat extract (5 µL/band) with different incubation times (0–30 min) of the amylolysis using either iodine/potassium iodide or iodine vapour as derivatization for detection of α-amylase inhibition in comparison with derivatization with the ninhydrin reagent for proteins and the diphenylamine aniline phosphoric acid reagent ( <b>DPA</b> ) for saccharides. As a negative control ( <b>NC</b> ), the assay was performed without enzyme. HPTLC silica gel 60 plates developed with 2-butanol/ammonia (25%)/pyridine/water 19:5:17:6 (V/V/V/V) up to 65 mm and documented at white light illumination (remission and transmission mode). | S6 |
| <b>Fig. S3</b>  | HPTLC-Vis chromatograms showing saccharide evaluation of the crude and filtered refined wheat extract (5 µL/band) and the corresponding filtrate (10 µL/band). The wheat extract was filtered once or twice for 30 min with a 3k Da Amicon Ultra-0,5 filter. For comparison, reference standards (1 µg/band) glucose (Glc), maltose (Mal) and maltotriose (Mal3) were applied on HPTLC silica gel 60 plates, developed with acetonitrile/water/2-propanol/acetone 6:1.5:2:0.5 (V/V/V/V) up to 70 mm, derivatized with the diphenylamine aniline phosphoric acid reagent and documented at white light illumination (remission and transmission mode).                                              | S7 |
| <b>Fig. S4</b>  | NP-HPTLC-nanoGIT chromatogram (amylolysis with 45.5 mU/band α-amylase + 2 µg/band soluble starch) after both on-surface pre- and main incubation of the positive control acarbose ( <b>PC</b> , 5 µg/band) and the negative control bi-distilled water ( <b>NC</b> ). For comparison, reference standards (1 µg/band) of glucose (Glc), maltose (Mal) and maltotriose (Mal3) were applied on HPTLC silica gel 60 plates, developed with acetonitrile/water/2-propanol/acetone 6:1.5:2:0.5 (V/V/V/V) up to 70 mm, derivatized with the <i>p</i> -aminobenzoic acid reagent and documented at FLD 366 nm.                                                                                            | S8 |
| <b>Fig. S5</b>  | Evaluation of an appropriate acarbose concentration as the positive control ( <b>PC</b> ) with an in-vial pre-incubation (30 min) and on-surface incubation (60 min). The pre-incubated enzyme-inhibitor mixture (11 µL/band) contained either acarbose (0.4 µg/µL) + α-amylase (4.5 mU/µL) in 25.1 µL ( <b>25:100</b> ), acarbose (80 ng/µL) + α-amylase (4.5 mU/µL) in 25.1 µL                                                                                                                                                                                                                                                                                                                   | S9 |

|                |                                                                                                                                                                                                                                                                                                                                                                                                                                                                                                                                                                                                                                                                                                                                                                                |     |
|----------------|--------------------------------------------------------------------------------------------------------------------------------------------------------------------------------------------------------------------------------------------------------------------------------------------------------------------------------------------------------------------------------------------------------------------------------------------------------------------------------------------------------------------------------------------------------------------------------------------------------------------------------------------------------------------------------------------------------------------------------------------------------------------------------|-----|
|                | ( <b>124:100</b> ) or acarbose (2.7 ng/μL) + α-amylase (10.3 mU/μL) in 11 μL ( <b>83:1</b> ). The negative control ( <b>NC</b> ) was α-amylase (113.8 mU/μL) + bi-distilled water. All samples were overspotted with soluble starch (2 μg/μL). For comparison, reference standards of glucose (Glc) 0.5 μg/μL, maltose (Mal) and maltotriose (Mal3) each 1 μg/μL were applied on HPTLC silica gel 60 plates, developed with acetonitrile/water/2-propanol/acetone 6:1.5:2:0.5 (V/V/V/V) up to 70 mm, derivatized with the <i>p</i> -aminobenzoic acid reagent and documented at FLD 366 nm.                                                                                                                                                                                    |     |
| <b>Fig. S6</b> | NP-HPTLC-nanoGIT (proteolysis)-Vis chromatogram of different ratios of trypsin to tryptone ( <b>1:1–2:100</b> ), trypsin (3 μg/μL) and tryptone (5 μg/μL). For the trypsin assay, tryptone (5 μg/μL) was overspotted with different volumes (0.4–18.5 μL) of 0.27 μg/μL trypsin. The HPTLC silica gel 60 plate was developed with 2-butanol/ammonia (25%)/pyridine/water 19:5:17:13 (V/V/V/V) up to 70 mm, derivatized with the ninhydrin reagent and documented at white light illumination in remission-transmission mode.                                                                                                                                                                                                                                                   | S10 |
| <b>Fig. S7</b> | RP-HPTLC-nanoGIT (proteolysis)-Vis chromatogram of the influence on the peptide separation and derivatization of an acidic or basic mobile phase on HPTLC RP-18 W plates (non-)buffered with citrate-phosphate buffer (pH 12). The trypsin assay (5 μL/μL, tryptone overspotted with trypsin) were applied with a trypsin/tryptone ratio of 1:20 ( <b>c<sub>1</sub></b> ) or 1:100 ( <b>c<sub>2</sub></b> ). Tryptone ( <b>a</b> , 5 μg/μL) and trypsin ( <b>b</b> , 0.25 μg/μL) were applied beside. The plates were developed with 2-propanol/formic acid/acetonitrile 10:1:5 (V/V/V) or 2-propanol/ammonia (25%)/acetonitrile 10:1:5 (V/V/V) up to 65 mm, derivatized with the ninhydrin reagent and documented at white light illumination in remission-transmission mode. | S11 |
| <b>Fig. S8</b> | RP-HPTLC-nanoGIT (proteolysis)-FLD chromatogram showing the influence of the enzyme-substrate ratio ( <b>1:20</b> or <b>1:100</b> ) and incubation time ( <b>2</b> or <b>18 h</b> ) on the in-vial trypsin-casein assay and the application volume ( <b>5</b> or <b>10 μL</b> ) on the peptide separation on HPTLC RP-18 W plates. The in-vial trypsin-casein assay was 100 μL casein (1 μg/μL) with trypsin (0.33 μg/μL) in the ratio of 1:20 or 1:100. The plate was developed with 2-propanol/formic acid/acetonitrile 10:1:5 (V/V/V) up to 65 mm, derivatized with the fluorescamine reagent and documented at FLD 366 nm in enhanced mode.                                                                                                                                | S12 |
| <b>Fig. S9</b> | RP-HPTLC-nanoGIT (proteolysis)-FLD chromatogram of the influence of pre-incubation times of 15 min ( <b>a</b> ) or 30 min ( <b>b</b> ) with different volumes of wheat extract (7, 17 and 27 μL) or a trypsin inhibitor as positive control ( <b>PC</b> ) on the in-vial trypsin inhibition assay. Application of 10 μL/μL of each wheat assay, the PC and the negative control ( <b>NC</b> , trypsin-casein assay (1:100) and a wheat extract blank (27 μL) on HPTLC RP-18 W plates. The plate was developed with 2-propanol/formic acid/acetonitrile 10:1:5 (V/V/V) up to 65 mm, derivatized with the fluorescamine reagent and documented at FLD 366 nm in enhanced mode.                                                                                                   | S13 |

**Table S1**

Absorbance values of the three saccharides released after the amylolysis for the different flour extracts ( $n = 1$ ), the positive controls (PC1/PC2, acarbose) and the negative control (NC, bi-distilled water) as well as the corrected absorbance (flour extract impurities subtracted), relative inhibition regarding each saccharide and the overall inhibition referred to the NC.

|                           | Saccharide  | Absorbance | Corrected absorbance | Inhibition [%] | Overall inhibition [%] |
|---------------------------|-------------|------------|----------------------|----------------|------------------------|
| Wheat extract blank       | Glucose     | 0.05654444 | Blank                |                |                        |
|                           | Maltose     | 0.06809270 |                      |                |                        |
|                           | Maltotriose | 0.00841666 |                      |                |                        |
| Wheat extract assay       | Glucose     | 0.09134534 | 0.034800903          | -59            | -40                    |
|                           | Maltose     | 0.21398657 | 0.145893872          | -119           |                        |
|                           | Maltotriose | 0.03206499 | 0.023648334          | 59             |                        |
| Whole wheat extract blank | Glucose     | 0.04721251 | Blank                |                |                        |
|                           | Maltose     | 0.05110990 |                      |                |                        |
|                           | Maltotriose | 0.00931743 |                      |                |                        |
| Whole wheat extract assay | Glucose     | 0.06811189 | 0.020899378          | 4              | -16                    |
|                           | Maltose     | 0.18340296 | 0.132293060          | -98            |                        |
|                           | Maltotriose | 0.02511425 | 0.015796815          | 73             |                        |
| Einkorn extract blank     | Glucose     | 0.05547531 | Blank                |                |                        |
|                           | Maltose     | 0.02432215 |                      |                |                        |
| Einkorn extract assay     | Glucose     | 0.08699152 | 0.031516217          | -44            | -14                    |
|                           | Maltose     | 0.14527881 | 0.120956658          | -81            |                        |
|                           | Maltotriose | 0.01343024 | -                    | 77             |                        |
| Spelt extract blank       | Glucose     | 0.02496919 | Blank                |                |                        |
|                           | Maltose     | 0.02618494 |                      |                |                        |
| Spelt extract assay       | Glucose     | 0.03958507 | 0.014615879          | 33             | 15                     |
|                           | Maltose     | 0.12393922 | 0.097754274          | -47            |                        |
|                           | Maltotriose | 0.01138892 | -                    | 80             |                        |
| Whole spelt extract blank | Glucose     | 0.07248845 | Blank                |                |                        |
|                           | Maltose     | 0.06095526 |                      |                |                        |
|                           | Maltotriose | 0.01227069 |                      |                |                        |
| Whole spelt extract assay | Glucose     | 0.11157182 | 0.039083369          | -79            | 4                      |
|                           | Maltose     | 0.14874004 | 0.087784777          | -32            |                        |
|                           | Maltotriose | 0.02603717 | 0.013766482          | 76             |                        |
| PC1                       | Glucose     | 0.04139276 |                      | -90            | 25                     |
|                           | Maltose     | 0.05287774 |                      | 21             |                        |
|                           | Maltotriose | 0.01401116 |                      | 76             |                        |
| PC2                       | Glucose     | 0.03449744 |                      | -58            | 26                     |
|                           | Maltose     | 0.04826322 |                      | 28             |                        |
|                           | Maltotriose | 0.02665399 |                      | 54             |                        |
| NC                        | Glucose     | 0.02183936 | Reference            |                | 0                      |
|                           | Maltose     | 0.06669746 |                      |                |                        |
|                           | Maltotriose | 0.05745075 |                      |                |                        |
| Amylase                   | Glucose     | 0.03121545 |                      |                |                        |
|                           | Maltose     | 0.03433898 |                      |                |                        |

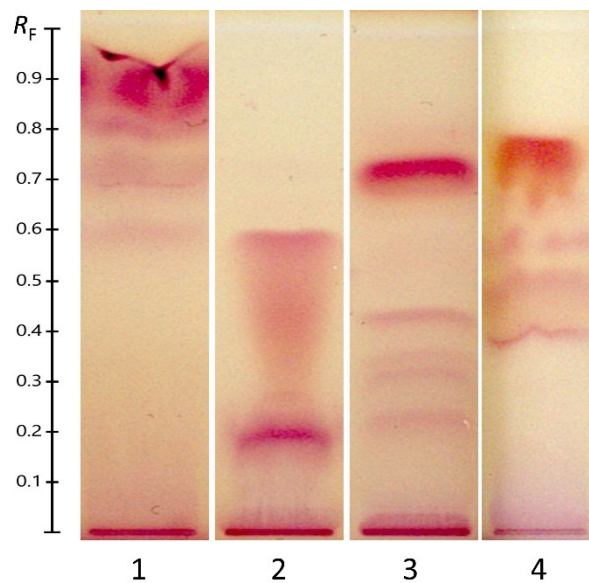

**Fig. S1** HPTLC-Vis chromatograms for mobile phase optimization with different ratios of 2-butanol/ammonia (25%)/pyridine/water: **(1)** 10:5:17:13, **(2)** 19:5:8:13, **(3)** 19:5:17:6, and **(4)** 19:5:17:13 (all V/V/V/V); HPTLC silica gel 60 plate derivatized with the ninhydrin reagent and detected at white light illumination (remission and transmission mode).

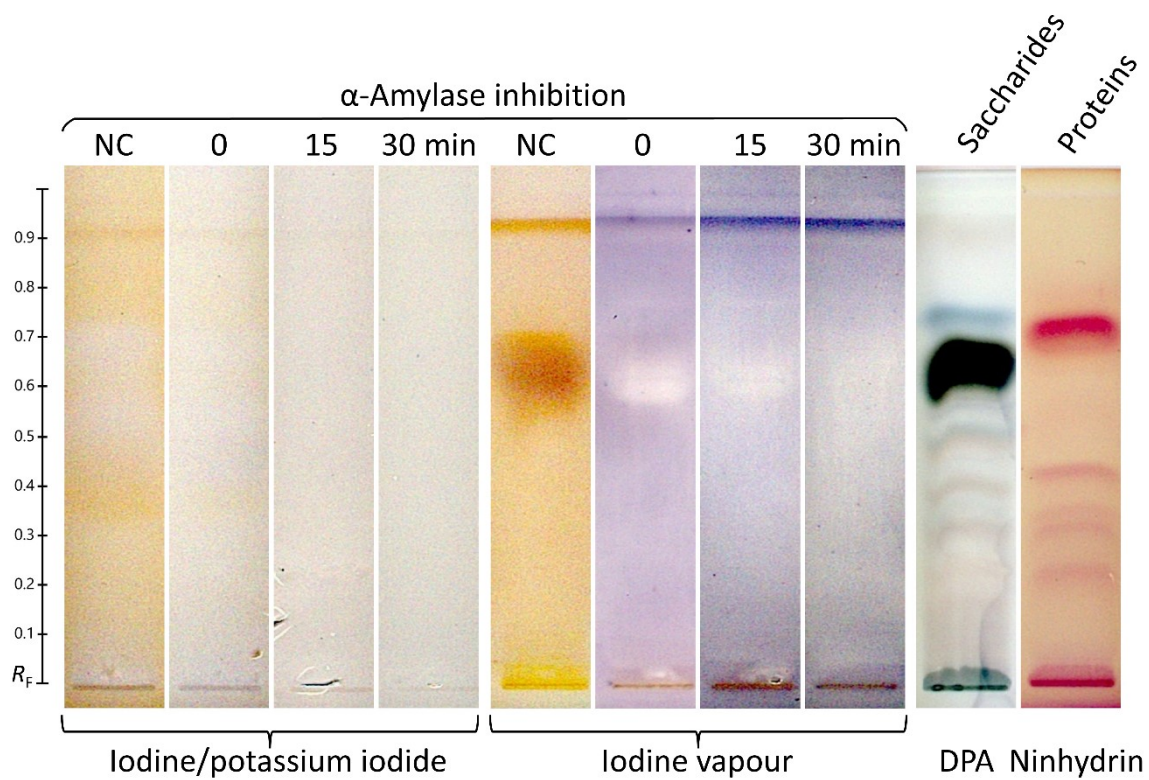

**Fig. S2** HPTLC-Vis chromatograms showing separated refined wheat extract (5  $\mu$ L/band) with different incubation times (0–30 min) of the amylolysis using either iodine/potassium iodide or iodine vapour as derivatization for detection of  $\alpha$ -amylase inhibition in comparison with derivatization with the ninhydrin reagent for proteins and the diphenylamine aniline phosphoric acid reagent (**DPA**) for saccharides. As a negative control (**NC**), the assay was performed without enzyme. HPTLC silica gel 60 plates developed with 2-butanol/ammonia (25%)/pyridine/water 19:5:17:6 (V/V/V/V) up to 65 mm and documented at white light illumination (remission and transmission mode).

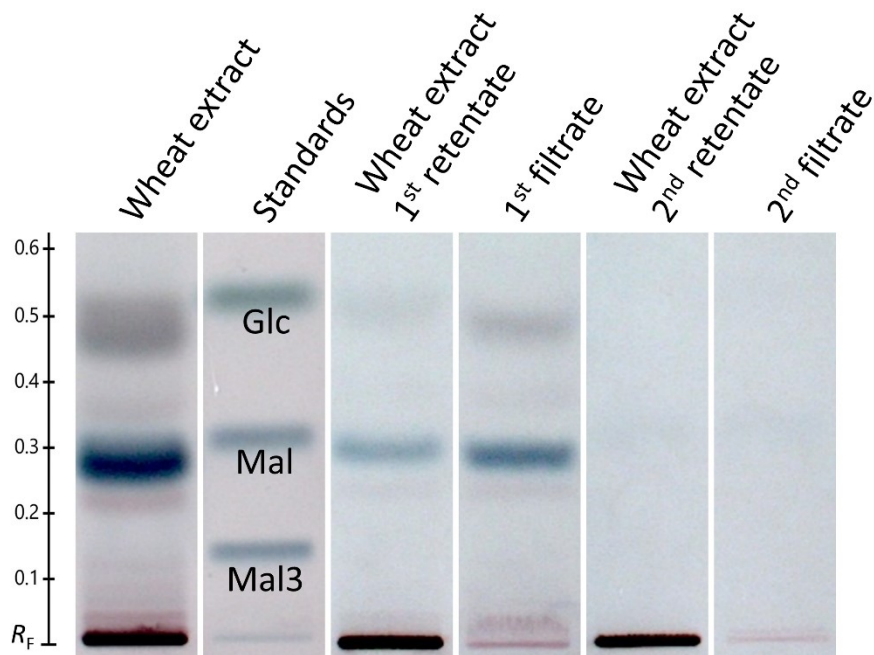

**Fig. S3** HPTLC-Vis chromatograms showing saccharide evaluation of the crude and filtered refined wheat extract (5  $\mu\text{L}/\text{band}$ ) and the corresponding filtrate (10  $\mu\text{L}/\text{band}$ ). The wheat extract was filtered once or twice for 30 min with a 3k Da Amicon Ultra-0,5 filter. For comparison, reference standards (1  $\mu\text{g}/\text{band}$ ) glucose (Glc), maltose (Mal) and maltotriose (Mal3) were applied on HPTLC silica gel 60 plate, developed with acetonitrile/water/2-propanol/acetone 6:1.5:2:0.5 (V/V/V/V) up to 70 mm, derivatized with the diphenylamine aniline phosphoric acid reagent and documented at white light illumination (remission and transmission mode).

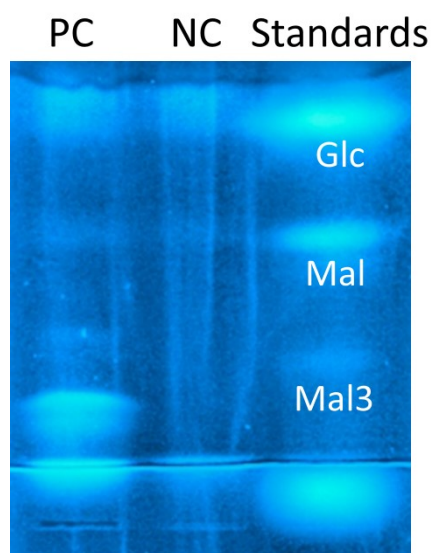

**Fig. S4** NP-HPTLC-nanoGIT chromatogram (amylolysis with 45.5 mU/band  $\alpha$ -amylase + 2  $\mu$ g/band soluble starch) after both on-surface pre- and main incubation of the positive control acarbose (**PC**, 5  $\mu$ g/band) and the negative control bi-distilled water (**NC**). For comparison, reference standards (1  $\mu$ g/band) of glucose (Glc), maltose (Mal) and maltotriose (Mal3) were applied on HPTLC silica gel 60 plates, developed with acetonitrile/water/2 propanol/acetone 6:1.5:2:0.5 (V/V/V/V) up to 70 mm, derivatized with the *p*-aminobenzoic acid reagent and documented at FLD 366 nm.



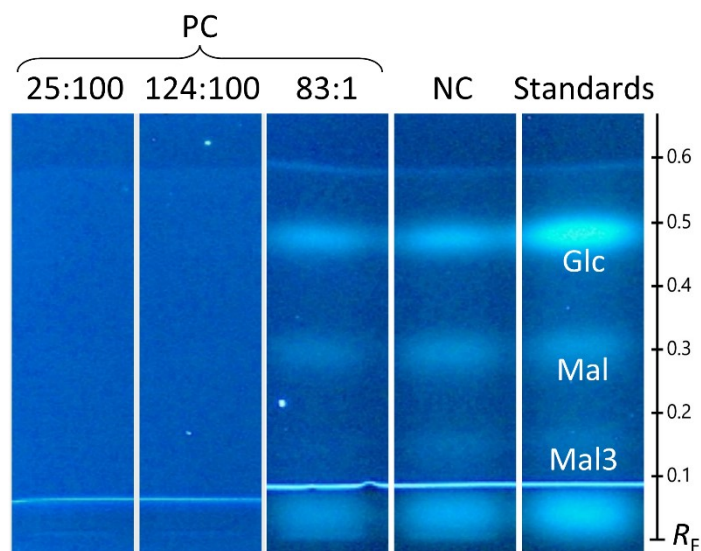

**Fig. S5** Evaluation of an appropriate acarbose concentration as the positive control (**PC**) with an in-vial pre-incubation (30 min) and on-surface incubation (60 min). The pre-incubated enzyme-inhibitor mixture (11  $\mu\text{L}/\text{band}$ ) contained either acarbose (0.4  $\mu\text{g}/\mu\text{L}$ ) +  $\alpha$ -amylase (4.5  $\text{mU}/\mu\text{L}$ ) in 25.1  $\mu\text{L}$  (**25:100**), acarbose (80  $\text{ng}/\mu\text{L}$ ) +  $\alpha$ -amylase (4.5  $\text{mU}/\mu\text{L}$ ) in 25.1  $\mu\text{L}$  (**124:100**) or acarbose (2.7  $\text{ng}/\mu\text{L}$ ) +  $\alpha$ -amylase (10.3  $\text{mU}/\mu\text{L}$ ) in 11  $\mu\text{L}$  (**83:1**). The negative control (**NC**) was  $\alpha$ -amylase (113.8  $\text{mU}/\text{band}$ ) + bi-distilled water. All samples were overspotted with soluble starch (2  $\mu\text{g}/\text{band}$ ). For comparison, reference standards of glucose (Glc) 0.5  $\mu\text{g}/\text{band}$ , maltose (Mal) and maltotriose (Mal3) each 1  $\mu\text{g}/\text{band}$  were applied on HPTLC silica gel 60 plates developed with acetonitrile/water/2-propanol/acetone 6:1.5:2:0.5 (V/V/V/V) up to 70 mm, derivatized with the *p*-aminobenzoic acid reagent and documented at FLD 366 nm.

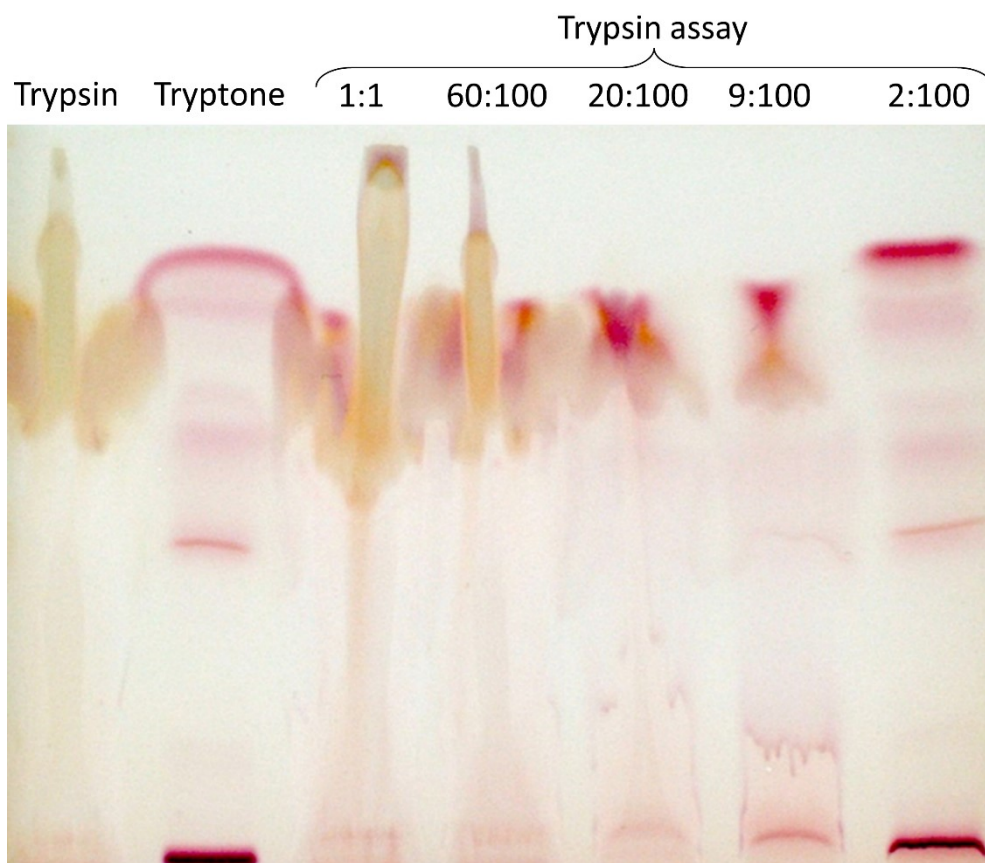

**Fig. S6** NP-HPTLC-nanoGIT (proteolysis)-Vis chromatogram of different ratios of trypsin to tryptone (**1:1–2:100**), trypsin (3 µg/band) and tryptone (5 µg/band). For the trypsin assay, tryptone (5 µg/band) was overspotted with different volumes (0.4–18.5 µL) of 0.27 µg/µL trypsin. The HPTLC silica gel 60 plate was developed with 2-butanol/ammonia (25%)/pyridine/water 19:5:17:13 (V/V/V/V) up to 70 mm, derivatized with the ninhydrin reagent and documented at white light illumination (remission and transmission mode).

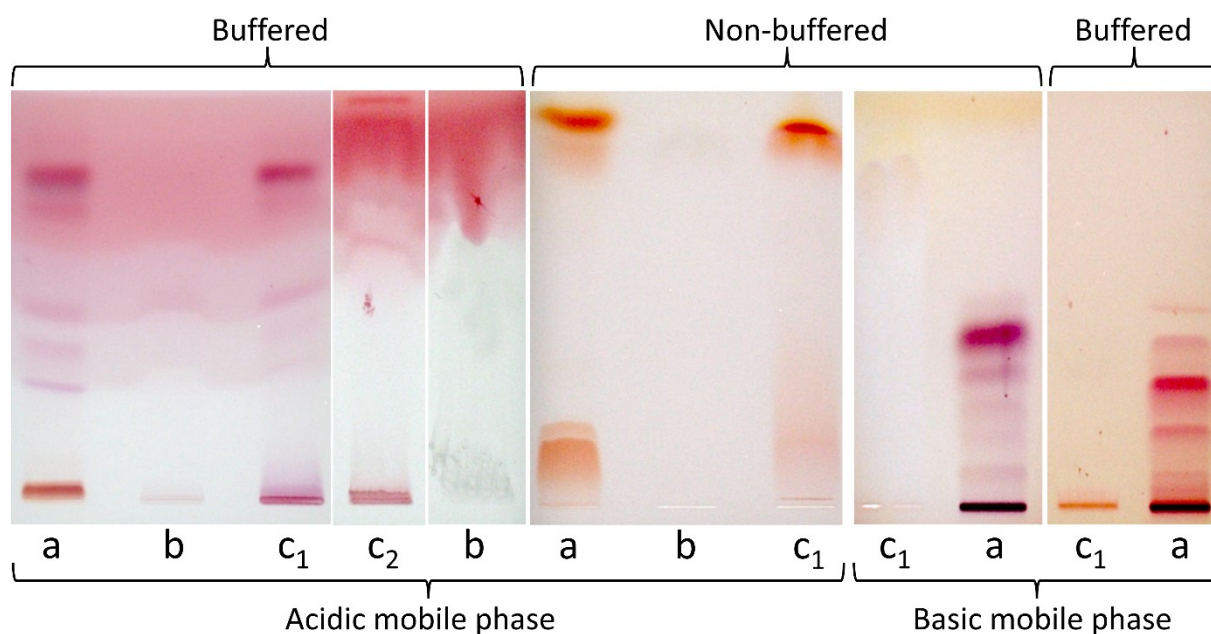

**Fig. S7** RP-HPTLC-nanoGIT (proteolysis)-Vis chromatogram of the influence on the peptide separation and derivatization of an acidic or basic mobile phase on HPTLC RP-18 W plates (non-)buffered with citrate-phosphate buffer (pH 12). The trypsin assay (5  $\mu$ L/band, tryptone overspotted with trypsin) were applied with a trypsin/tryptone ratio of 1:20 (**c**<sub>1</sub>) or 1:100 (**c**<sub>2</sub>). Tryptone (**a**, 5  $\mu$ g/band) and trypsin (**b**, 0.25  $\mu$ g/band) were applied beside. The plates were developed with 2-propanol/formic acid/acetonitrile 10:1:5 (V/V/V) or 2-propanol/ammonia (25%)/acetonitrile 10:1:5 (V/V/V) up to 65 mm, derivatized with the ninhydrin reagent and documented at white light illumination (remission and transmission mode).

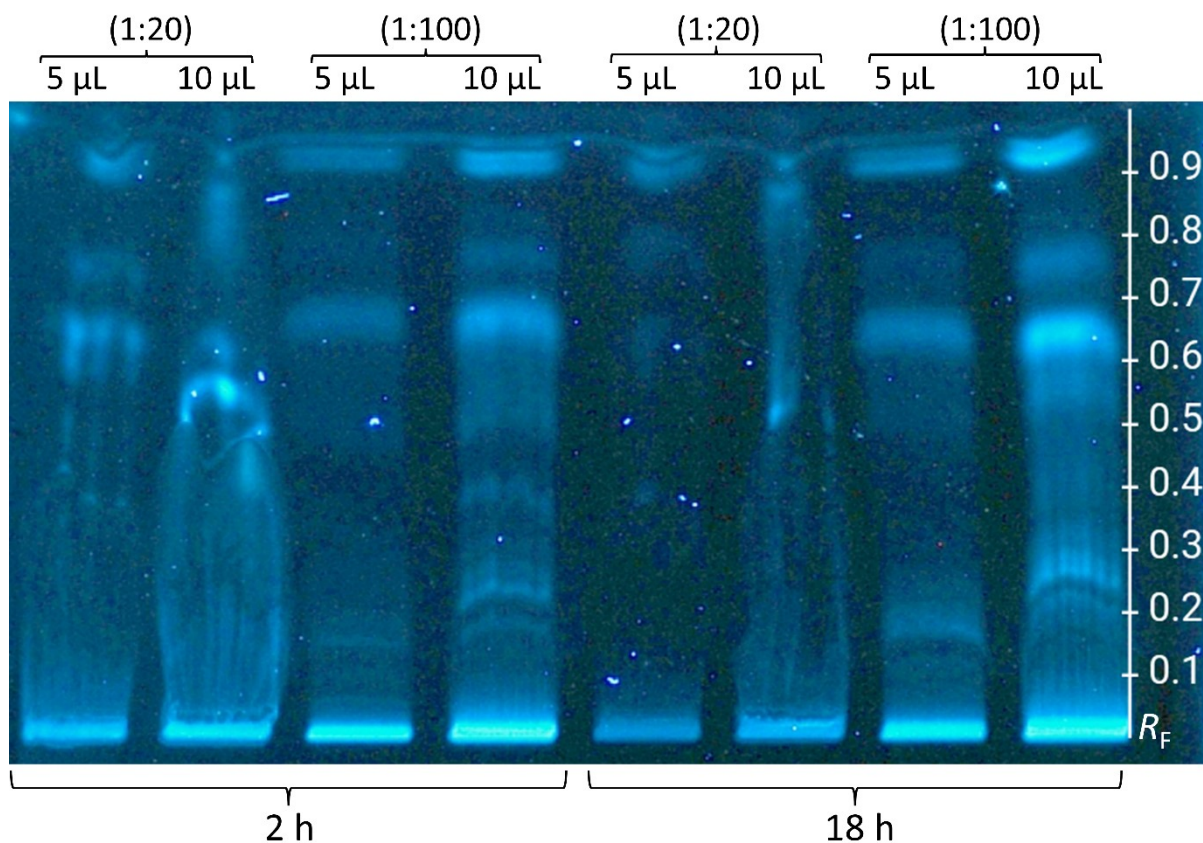

**Fig. S8** RP-HPTLC-nanoGIT (proteolysis)-FLD chromatogram showing the influence of the enzyme-substrate ratio (**1:20** or **1:100**) and incubation time (**2** or **18 h**) on the in-vial trypsin-casein assay and the application volume (**5** or **10 µL**) on the peptide separation on HPTLC RP-18 W plates. The in-vial trypsin-casein assay was 100 µL casein (1 µg/µL) with trypsin (0.33 µg/µL) in the ratio of 1:20 or 1:100. The plate was developed with 2-propanol/formic acid/acetonitrile 10:1:5 (V/V/V) up to 65 mm, derivatized with the fluorescamine reagent and documented at FLD 366 nm (enhanced mode).

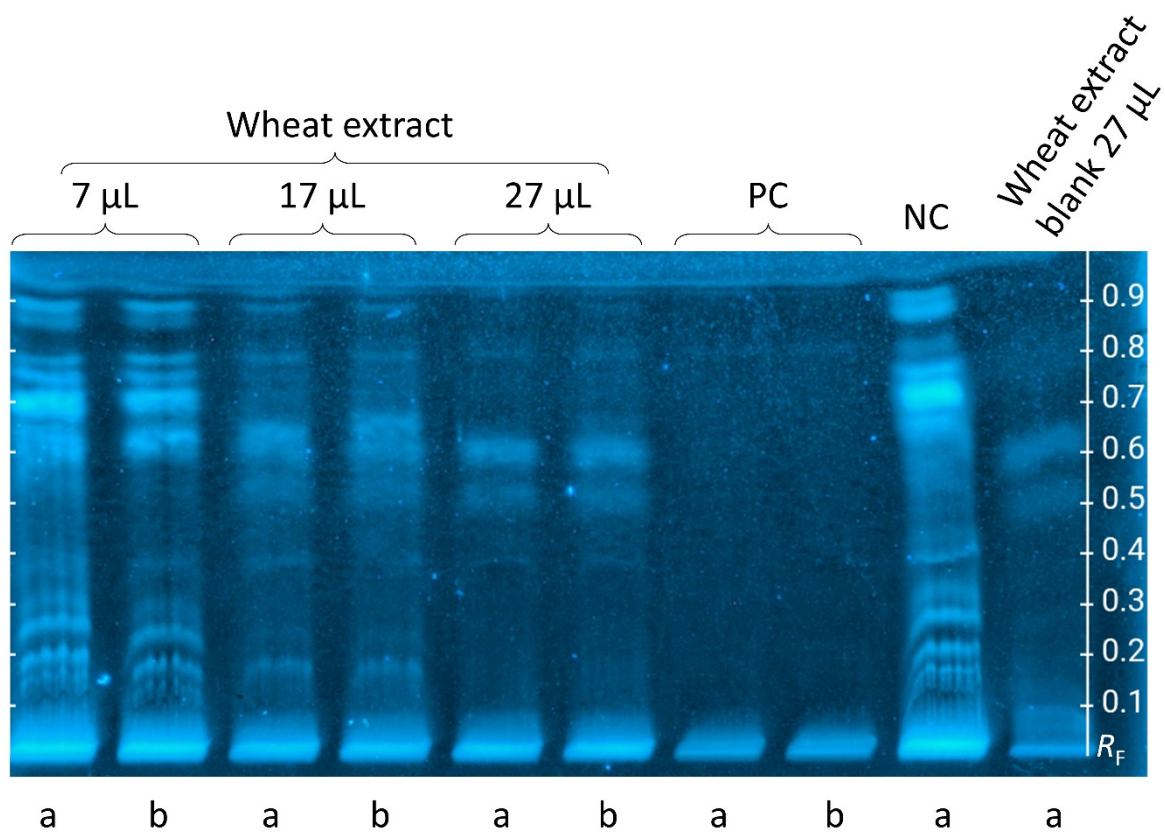

**Fig. S9** RP-HPTLC-nanoGIT (proteolysis)-FLD chromatogram of the influence of pre-incubation times of 15 min (**a**) or 30 min (**b**) with different volumes of wheat extract (7, 17 and 27  $\mu\text{L}$ ) or a trypsin inhibitor as positive control (**PC**) on the in-vial trypsin inhibition assay. Application of 10  $\mu\text{L}$ /band of each wheat assay, the PC and the negative control (**NC**, trypsin-casein assay (1:100) and a wheat extract blank (27  $\mu\text{L}$ ) on HPTLC RP-18 W plates. The plate was developed with 2-propanol/formic acid/acetonitrile 10:1:5 (V/V/V) up to 65 mm, derivatized with the fluorescamine reagent and documented at FLD 366 nm (enhanced mode).
